# Supplementary material for: Independent and interactive effects of DOF affecting germination 1 (DAG1) and the Della proteins GA insensitive (GAI) and Repressor of ga1-3 (RGA) in embryo development and seed germination
Source: PubMed Central journal article supplement (PMC4222566; doi:10.1186/s12870-014-0200-z), 2014-07-26

**A**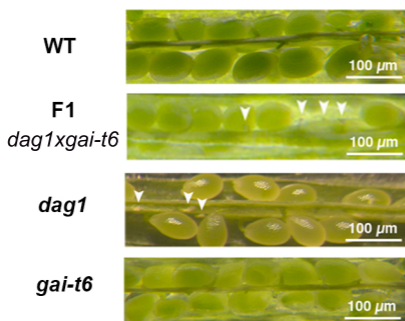**B**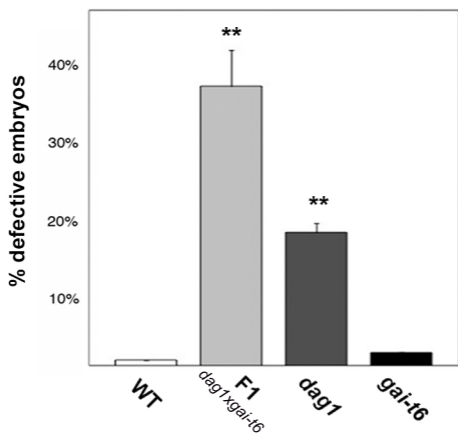

Supplement: s12870-014-0200-z-S1.pdf [file s12870-014-0200-z-S1.pdf]
