# Supplementary material for: Independent and interactive effects of DOF affecting germination 1 (DAG1) and the Della proteins GA insensitive (GAI) and Repressor of ga1-3 (RGA) in embryo development and seed germination
Source: PubMed Central journal article supplement (PMC4222566; doi:10.1186/s12870-014-0200-z), 2014-07-26
Supplement: s12870-014-0200-z-S2.pdf [file s12870-014-0200-z-S2.pdf]

Specific primer sets used in this paper:

|                       | Forward                                | Reverse                                 |
|-----------------------|----------------------------------------|-----------------------------------------|
| <b><i>RGA</i></b>     | GAG TAT CGG AGA GAC AAT GA             | ACG GGA CTT CTT CTT CAT CA              |
| <b><i>rga28</i></b>   | GAG TAT CGG AGA GAC AAT GA             | GGC AAT CAG CTG TTG CCC GTC TCA CTG GTG |
| <b><i>GAI</i></b>     | CTA GAT CCG ACA TTG AAG GA             | AGC ATC AAG ATC AGC TAA AG              |
| <b><i>gai-t6</i></b>  | CTA GAT CCG ACA TTG AAG GA             | TCG GTA CGG GAT TTT CGC AT              |
| <b><i>DAG1</i></b>    | GTT TGT TTG TGC TTC TCC CCG ACT CTC AC | GTA TTG TTG TTC TCT ATC TTG GGC A       |
| <b><i>dag1</i></b>    | CTG ATA CCA GAC GTT GCC CGC ATA A      | GTA TTG TTG TTC TCT ATC TTG GGC A       |
| <b><i>DAG1-HA</i></b> | TAC TCA TCT TTA GGG TTT CCA            | GCG TAA TCT GGA ACG TCA TAT             |
